# Supplementary material for: Polypharmacy in older patients: identifying the need for support by a community pharmacist
Source: PubMed Central journal article supplement (PMC6802481; doi:10.1186/s12877-019-1276-y), 2019-10-21
Supplement: 12877_2019_1276_MOESM1_ESM.pdf [file 12877_2019_1276_MOESM1_ESM.pdf]

## Topic guide - Management of personal treatment & iatrogeny

### Patient identification (to be prepared before the interview)

Name, first name: \_\_\_\_\_ Age: \_\_\_\_\_

Name (telephone number) of the attending physician: \_\_\_\_\_

Weight: \_\_\_\_\_ kg Size: \_\_\_\_\_ m

Postal code of residence: \_\_\_\_\_

Open PD:  Yes  No (*if no, try to convince the patient to open a PD*)

Hospital discharge:  Yes  No

#### Comorbidities

Memory Disease

Myocardial Infarction

Dyslipidemia

peripheral arterial occlusive disease

Diabetes

Chronic renal failure

Heart failure

Other: \_\_\_\_\_

Current treatment (number of prescribed drugs: \_\_\_\_\_ + self-medication: \_\_\_\_\_)

Indicate the drugs (specialty name, dosage and international non-proprietary name):

- \_\_\_\_\_ - \_\_\_\_\_  
- \_\_\_\_\_ - \_\_\_\_\_  
- \_\_\_\_\_ - \_\_\_\_\_  
- \_\_\_\_\_ - \_\_\_\_\_  
- \_\_\_\_\_ - \_\_\_\_\_  
- \_\_\_\_\_ - \_\_\_\_\_  
- \_\_\_\_\_ - \_\_\_\_\_  
- \_\_\_\_\_ - \_\_\_\_\_  
- \_\_\_\_\_ - \_\_\_\_\_

Points of attention regarding treatment:  Yes  No

Which ones: \_\_\_\_\_

Date of the first interview: \_\_\_\_\_

*Suggest to the patient to come with his biological assessments*

Dates of the following dispensations: \_\_\_\_\_

**Interview with the patient**

**with the caregiver**

### Treatment & Interoception

Do you know what your medications are used for?  Yes  No

Number of drugs identified:        / total number of drugs :

Do you know what precautions to take with your treatments?  Yes  No  
*Target, if applicable, KIAs, hypoglycemic agents, CKD management, pain medications*

Did you know that some of your medications can disrupt driving?  Yes  No

In case of "banal" pain or low fever, do you know the most appropriate medication?  Yes  No

Do you ever take medication on your own initiative? (including with some food supplements or plants)  Yes  No

Do you ever change the dosage of drugs on your own initiative?  Yes  No

What do you do if you forget to take one of your medications?

Do you get vaccinated regularly?  Yes  No

Have you ever had any adverse reactions or unpleasant reactions with your treatment?  Yes  No

Can you describe them? What is your attitude in this case?

Have you ever fallen?  Yes  No

How many times and when?

Under what conditions?

Do you have difficulty walking?

Have you lost weight recently?  Yes  No

## Processing management

Have you been hospitalized in the last 6 months?  Yes  No  
If so, why not?

Do you live alone?  Yes  No

Do you have a home helper?  Yes  No

Who prepares your treatment?  You yourself  Your spouse  Other:

How?  from the prescription  from information written by your pharmacist on the boxes?

Do you have difficulties preparing your treatment?  Yes  No  
Which ones?

*Evaluate possible reading difficulties and/or vision/dexterity problems that could have an impact on treatment follow-up*

Do you use a pill dispenser?  Yes  No  
*Possibly propose one that the association of tutors has provided you with*  
*If so, can you show me how you use it?*

Do you take your treatment alone/independently?  Yes  No

Do you have a stock of medicines in your home?  Yes  No  
Can I come and see them to sort it out?  Yes  No

Do you have difficulty swallowing medications?  Yes  No  
If so, how do you do it?  
*Identify potential problem drugs.*  
If so, how many?

Do you have any difficulties taking certain medications?  Yes  No  
*Ask concretely how they do it (eye drops, ½ tablets, inhaler...)*

TIME SPENT FOR THE INTERVIEW:

## **SUMMARY OF THE POINTS OF REFERENCE DURING THIS INTERVIEW**

*In case of attention points, formulate the elements of the interview with the attending physician to be validated by your internship supervisor before contact with the attending physician.*

## **REPORT OF THE CONTACT WITH THE DOCTOR**

*Specify the consequences of this interview for the patient's management.*
